# Supplementary material
Source: publisher site journal article supplement (https://www.dovepress.com/article/413470)
Supplement: Supplementary file 1 [file get_supplementary_file.php]

**Supplementary Table 1.** Summary Table

| **- Reference**  **- Year**  **- Country** | **- Study Design**  **- Sample size**  **- Target population** | **Objective** | **Results**  **(Utilize ChatGPT in medical research)** | **Main result/key finding** | **Suggestions for future research** |
| --- | --- | --- | --- | --- | --- |
| Study No.1[1](#_ENREF_1)  - 2022  - Spain | - Literature Review  - N/A  - N/A | This article discussed the benefits, challenges, and drawbacks of AI in drug discovery and proposed possible strategies and approaches for  overcoming barriers. | - This paper was generated with the assistance of ChatGPT and verified by human authors. - The result suggested that AI techniques, such as machine learning, can accelerate and improve drug development processes by enabling more efficient and accurate analysis of large amounts of data. - AI has been found to predict the efficacy of drug compounds with high accuracy successfully. - Although AI is expected to significantly contribute to developing new medications and therapies in the following few years, limitations, including ethical issues, must be considered. | - Writing literature review - Drug development | - This article indicated that it is essential for researchers to carefully consider the potential risks of utilizing AI in scientific research and to take steps to mitigate these risks. - AI should be employed with caution in science until it can be entrusted to produce reliable and accurate information. Moreover, it is crucial to carefully evaluate the information provided by AI tools and validate it using reliable sources. |
| Study No.2[2](#_ENREF_2)  - 2022  - Germany | - Exploratory case study  - 15  - Radiologists | To investigate the phenomenon that emerging large learning AI models (LLMs) such as ChatGPT may be used to simplify radiology reports. | - Overall, radiologists agreed that the simplified reports were complete but had some errors (missed findings, unspecific locations). This suggests that paraphrasing and explaining complex medical terminology in simple terms can cause a loss of medical context and precision. - Although radiologists largely disagreed with any potentially harmful conclusions, the aforementioned issues may cause harm. - Patient care may be improved with successful simplified reports generated by ChatGPT. However, if left unresolved, current sources of errors could mislead patients and further complicate medical service and clinical decision-making. | - Medical report improvement | - ChatGPT was not explicitly developed for simplifying medical reports. However, it has been shown to perform surprisingly well. A domain adaptation of ChatGPT to the medical field could improve the quality of radiology reports (e.g., greater precision with an interpretation of medical terms).   **Limitation**   - ChatGPT is trained on data with specific timestamps, whereas medicine is an active and dynamic field. Consequently, simplified reports may not reflect diseases with rare features or recent advancements in medical knowledge and information.   **Future integration of ChatGPT**   - LLMs may involve a simplified radiology report autogenerated alongside an original report, proofread by a radiologist, and corrected where needed. - Reports would then be issued to the patient. Patient care could be improved if delivered in-premise in a privacy-preserving way. - Future research is needed to validate the findings of this case study and further explore the many possibilities of this new technology in the medical domain. - Patients' opinions regarding the accessibility of those simplified reports and their overall added value within the treatment process should be investigated. |
| Study No.3[3](#_ENREF_3)  - 2022  - Republic of Korea | - Not specify  - N/A  - N/A | The study aimed to investigate the medical information and treatment options that ChatGPT can provide for shoulder impingement syndrome (SIS). | - ChatGPT did not show any grammatical errors or use incomprehensible/awkward expressions. - Words were used at a level that even those unfamiliar would understand. Answers were suitable for the input messages. - ChatGPT output provides basic and uncontroversial treatment options. - However, more details and specific treatment options would be obtained through a medical professional. - It will be difficult for non-experts to determine treatment options based on minimal depth in the information provided by ChatGPT since effective treatment varies greatly depending on an individual’s condition or degree of SIS. - ChatGPT considers exercise to be one of the important factors in recovering from SIS and provides several exercise examples. However, the description of the posture and action of the pendulum exercise was inaccurate. - ChatGPT recommended scapular squeeze/adduction as an exercise for scapular impingement. However, no studies are backing this exercise for recovering from SIS. - External and internal rotation exercises answered by ChatGPT are low-intensity exercises that do not apply to shoulder rotation – a key aspect in achieving complete recovery from SIS. - ChatGPT’s guide to flexing the shoulders may make it challenging to perform the movement or aggravate symptoms (potential harm). - Overall, ChatGPT provides helpful information for patients unfamiliar with SIS or treatment options. However, it may be biased, incomplete, peripheral, or inappropriate. | - Providing treatment - Providing medical information | - ChatGPT can provide helpful medical information and treatment options to patients unfamiliar with SIS. If this technology continues to develop further, it will have promising medical applications. - ChatGPT can provide general and basic level medical information. However, future technological advances made together with the medical field would pave the way to developing AI with more accurate and detailed medical and treatment information.   **Limitations**   - ChatGPT is a stateful chatbot where answers are provided while recording prior conversations. Therefore, messages entered earlier (order of messages) can influence outputs. - Modeling/training is limited by the difficulty of accessing medical data that are often sensitive or shared in the form of research or books. |
| Study No.4[4](#_ENREF_4)  - 2022  - Turkey | - Literature Review  - N/A  - N/A | This study attempts to show that the compilation and expression of knowledge will be accelerated with the help of artificial intelligence. This was done by using ChatGPT to create a literature review of the theme “the application of digital twins in healthcare.” | - The texts written by study authors tested very low in plagiarism. - The paraphrased abstracts created by ChatGPT had very high levels of plagiarism. - Answers provided by ChatGPT to specific questions asked had relatively low plagiarism rates. - ChatGPT does not produce original texts after paraphrasing. | - Writing literature review | - The researchers aim to evaluate this study when it has reached a high number of citations (e.g., 100). This is to evaluate the academic validity and acceptance of the information generated by ChatGPT in this article. This will be determined by considering whether the citations of this article are positive, neutral, or negative. |
| Study No.5[5](#_ENREF_5)  - 2023  - USA, Germany, Switzerland | - Editorial  - N/A  - N/A | This study uses ChatGPT to illustrate how developments in computation can help practitioners across the broader stem cell research discipline, particularly by saving them time to do more research. | - According to ChatGPT, computational systems biology will aid in stem cell research in the following ways: - The ability to process and analyze a large amount of cell-related data. - Optimize stem cell culture conditions allowing researchers to grow stem cells more efficiently and with greater control. - Help create detailed models of stem behavior, which would help researchers better understand how these cells respond to stimuli and how they can be manipulated for different purposes. - ChatGPT also identified that a significant challenge to providing these benefits would be the complicated process that involves collecting and processing large amounts of data about the behavior of individual cells and the various interactions that arise between these cells. | - Improve research conduction | - The authors note that several threads of their conversations with ChatGPT were excluded because they were repetitive and lacked depth and insight. They agree with previous researchers that computational machine learning tools such as ChatGPT should be used simultaneously with an explicit and sound theory. |
| Study No.6[6](#_ENREF_6)  - 2023  - USA | - Perspective  - N/A  - N/A | To use ChatGPT to discuss the role of AI in translational medicine. | **AI is the future of translational medicine**   - AI can be used in big data analysis, such as electronic medical records and genomic data. Ultimately, it can help identify the factor causing disease and predict patient outcomes. - AI can help develop personalized medicine which helps tailored to the specific need (e.g., treatment and medication) and characteristics of individual patients. - AI algorithms can help speed up new drug development and treatment and identify the side effect and interactions.   **AI is not the future of translational medicine**   - The algorithms could be biased and incomplete if the trained data is biased and incomplete. Consequently, it can lead to inaccurate results, impacting patient care and outcomes. - Al may not understand the biological mechanisms of the human body system. Therefore, AI may not completely provide factors contributing to disease and treatment. - There is a concern about the ethical implication of using AI. For example, suppose AI users use an algorithm to discriminate against a particular population group or prioritize a specific population group. In that case, this could lead to future inequality in healthcare and impact human life. | - Data analysis - Personalize medicine - Drug development | The discussion with ChatGPT suggested that AI is the potential technology that helps develop translational medicine, such as big data analysis, personalized medicine, and drug and treatment development. However, there are limitations that need to be considered, such as bias, the complexity of the human system, and ethical implication. Therefore, it is possible that in the near future, AI may be used to conduct translational medicine under human supervision and ethical protocol. |

**Reference**

1. Blanco-Gonzalez A, Cabezon A, Seco-Gonzalez A, et al. The Role of AI in Drug Discovery: Challenges, Opportunities, and Strategies. *arXiv preprint arXiv:221208104*. 2022.

2. Jeblick K, Schachtner B, Dexl J, et al. ChatGPT Makes Medicine Easy to Swallow: An Exploratory Case Study on Simplified Radiology Reports. *arXiv preprint arXiv:221214882*. 2022.

3. Kim J-h. Search for Medical Information and Treatment Options for Musculoskeletal Disorders through an Artificial Intelligence Chatbot: Focusing on Shoulder Impingement Syndrome. *medRxiv*. 2022: 2022.12. 16.22283512.

4. Aydın Ö and Karaarslan E. OpenAI ChatGPT generated literature review: Digital twin in healthcare. *Available at SSRN 4308687*. 2022.

5. Cahan P and Treutlein B. A conversation with ChatGPT on the role of computational systems biology in stem cell research. *Stem Cell Reports*. 2023; 18: 1-2.

6. Mann DL. Artificial Intelligence Discusses the Role of Artificial Intelligence in Translational Medicine: A JACC: Basic to Translational Science Interview With ChatGPT. *Basic to Translational Science*. 2023.
